# Supplementary material
Source: PubMed Central journal article supplement (PMC8570272)
Supplement: jb.00402-21-s0001.pdf [file jb.00402-21-s0001.pdf]

## 1 SUPPLEMENTAL MATERIALS

### 2 Construction of plasmids

3 **(i) The temperature-sensitive suicide plasmids for the construction of mutant strains of *M.***  
4 ***smegmatis*.** To construct pKOTs $\Delta$ icl1, PCR was conducted with the primers F\_icl1mut and  
5 R\_icl1mut and the chromosomal DNA of *M. smegmatis* as a template. The amplified 1,938-bp  
6 DNA fragment was restricted with HindIII and NotI and cloned into pBluescript II KS+ digested  
7 with the same enzymes, yielding pBSIIicl1 full. A 1,012-bp DNA fragment within *icl1* was excised  
8 from pBSIIicl1 full by restriction with PstI, and the linear plasmid was self-ligated, resulting in  
9 pBSII $\Delta$ icl1. The 913-bp HindIII-NotI DNA fragment from pBSII $\Delta$ icl1 was cloned into pKOTs,  
10 yielding pKOTs $\Delta$ icl1.

11 For the construction of pKOTs $\Delta$ icl2, two rounds of recombination PCR were conducted. Using the  
12 chromosomal DNA of *M. smegmatis* as a template, two primary PCR reactions were performed  
13 with the primers F\_icl2mut and R\_icl2rec, as well as with the primers F\_icl2rec and R\_icl2mut to  
14 generate two 38-bp overlapping DNA fragments (455 and 487 bp, respectively). Both PCR  
15 products contain the same 2,062-bp deletion within *icl2* in the overlapping region. In the secondary  
16 PCR, a 904-bp DNA fragment with deletion of *icl2* was obtained using both the primary PCR  
17 products as templates and the F\_icl2mut and R\_icl2mut primers. The secondary PCR product was  
18 restricted with HindIII and NotI and cloned into pKOTs digested with the same enzymes, yielding  
19 pKOTs $\Delta$ icl2.

20 To construct pKOTs $\Delta$ ramB, two rounds of recombination PCR were conducted. Using the  
21 chromosomal DNA of *M. smegmatis* as a template, two primary PCR reactions were performed

22 with the primers F\_ramBmut and R\_ramBrec, as well as with the primers F\_ramBrec and  
23 R\_ramBmut to generate two 37-bp overlapping DNA fragments (469 and 510 bp, respectively).  
24 Both PCR products contain the same 1,203-bp deletion within *ramB* in the overlapping region. In  
25 the secondary PCR, a 942-bp DNA fragment with in-frame deletion of *ramB* was obtained using  
26 both the primary PCR products as templates and the F\_ramBmut and R\_ramBmut primers. The  
27 secondary PCR product was restricted with HindIII and NotI and cloned into pKOTs, yielding  
28 pKOTs $\Delta$ ramB.

29 To construct pKOTs $\Delta$ prpR, two rounds of recombination PCR were conducted. Using the  
30 chromosomal DNA of *M. smegmatis* as a template, two primary PCR reactions were performed  
31 with the primers F\_prpRmut and R\_prpRrec, as well as with the primers F\_prpRrec and  
32 R\_prpRmut to generate two 36-bp overlapping DNA fragments (606 and 419 bp, respectively).  
33 Both PCR products contain the same 1,102-bp deletion within *prpR* in the overlapping region. In  
34 the secondary PCR, a 989-bp DNA fragment with deletion of *prpR* was obtained using both the  
35 primary PCR products as templates and the F\_prpRmut and R\_prpRmut primers. The secondary  
36 PCR product was restricted with HindIII and NotI and cloned into pKOTs digested with the same  
37 enzymes, yielding pKOTs $\Delta$ prpR.

38 To construct pKOTs $\Delta$ ramA, two rounds of recombination PCR were conducted. Using the  
39 chromosomal DNA of *M. smegmatis* as a template, two primary PCR reactions were performed  
40 with the primers F\_ramAmut and R\_ramArec, as well as with the primers F\_ramArec and  
41 R\_ramAmut to generate two 38-bp overlapping DNA fragments (413 and 506 bp, respectively).  
42 Both PCR products contain the same 384-bp deletion within *ramA* in the overlapping region. In

43 the secondary PCR, an 881-bp DNA fragment with deletion of *ramA* was obtained using both the  
44 primary PCR products as templates and the F\_ramAmut and R\_ramAmut primers. The secondary  
45 PCR product was restricted with HindIII and NotI and cloned into pKOTs, yielding pKOTs $\Delta$ ramA.

46 **(ii) pNCIIicl1, pNCIIicl2, and pNCIIramB.** pNCIIicl1 is a *icl1::lacZ* translational fusion  
47 plasmid that contains the 5' portion (99 bp) of *icl1* and the 434-bp DNA sequence upstream of *icl1*  
48 start codon. For the construction of pNCIIicl1, a 553-bp DNA fragment was amplified by using  
49 the chromosomal DNA of *M. smegmatis* as a template and the F\_icl1lacZ and R\_icl1lacZ primers.  
50 The PCR product was restricted with ClaI and XbaI and cloned into pBluescript II KS+, resulting  
51 in pBSIIicl1. pBSIIicl1 was restricted with ClaI and XbaI, and the 542-bp fragment was cloned  
52 into the promoterless *lacZ* vector pNCII, yielding pNCIIicl1.

53 To construct pNCIIicl2, a 493-bp DNA fragment comprising the 5' portion (111 bp) of *icl2* and the  
54 362-bp DNA sequence upstream of *icl2* was amplified with the F\_icl2lacZ and R\_icl2lacZ primers  
55 using the chromosomal DNA of *M. smegmatis* as a template. The PCR product was restricted with  
56 ClaI and XbaI and cloned into pNCII, resulting in pNCIIicl2.

57 For the construction of pNCIIramB, a 453-bp DNA fragment comprising the 5' portion (129 bp)  
58 of *ramB* and the 304-bp DNA sequence upstream of *ramB* was amplified with the F\_ramBlacZ  
59 and R\_ramBlacZ primers using the chromosomal DNA of *M. smegmatis* as a template. The PCR  
60 product was restricted with ClaI and XbaI and cloned into pNCII, yielding pNCIIramB.

61 **(iii) pNCIIicl1BM1 and pNCIIicl1BM2.** To construct pNCIIicl1BM1 and pNCIIicl1BM2, PCR-  
62 based site-directed mutagenesis was carried out using pBSIIicl1 as a template. Synthetic  
63 complementary oligonucleotides 34-36 bases long containing the substituted nucleotides in the

64 middle of their sequences were used to mutagenize the RamB-binding sites (RamBS1 and  
65 RamBS2), resulting in pBSIIicl1BM1 and pBSIIicl1BM2, respectively. The 542-bp ClaI-XbaI  
66 fragments from the mutated pBSIIicl1BM1 and pBSIIicl1BM2 were cloned into pNCII, resulting  
67 in the plasmids pNCIIicl1BM1 and pNCIIicl1BM2, respectively.

68 **(iv) pEMII.** pEMII is a *lacZ* translational fusion vector containing the kanamycin resistance gene.  
69 To construct pEMII, a 1,391-bp DNA fragment containing the kanamycin resistance gene was  
70 amplified by PCR with the F\_km and R\_km primers using pMV306 as a template. The product  
71 was digested with SacII and cloned into pNCII, resulting in pEMII.

72 **(v) pEMIIicl1.** To construct pEMIIicl1, a 553-bp DNA fragment comprising the 5' portion (99 bp)  
73 of *icl1* and the 434-bp DNA sequence upstream of *icl1* was amplified with the F\_icl1lacZ and  
74 R\_icl1lacZ primers using the chromosomal DNA of *M. smegmatis* as a template. The PCR product  
75 was restricted with ClaI and XbaI and cloned into pEMII, yielding pEMIIicl1.

76 **(vi) pET29bramB.** A 1,472-bp DNA fragment containing the *ramB* gene and six His codons  
77 immediately before its stop codon was amplified by PCR with the F\_ramBhis6 and R\_ramBhis6  
78 primers using the chromosomal DNA of *M. smegmatis* as a template. The PCR product was  
79 restricted with NdeI and HindIII and cloned into pET29b, yielding pET29bramB.

80 **(vii) pUC19icl1FootF and pUC19icl1FootR.** The plasmids were used as templates for the  
81 generation of TAMRA-labeled DNA fragments containing the *icl1* regulatory region. For the  
82 construction of pUC19icl1FootF, a 363-bp DNA fragment encompassing the RamB-binding sites  
83 (RamBS1, RamBS2, and RamBS3) and Crp-binding site (CrpBS) was amplified by PCR with the  
84 F\_icl1FootF and R\_icl1FootF primers using the chromosomal DNA of *M. smegmatis* as a template.

85 The PCR product was restricted with EcoRI and HindIII and cloned into pUC19, yielding  
86 pUC19icl1FootF. The same strategy was applied to construct pUC19icl1FootR except using the  
87 F\_icl1FootR and R\_icl1FootR primers in place of the F\_icl1FootF and R\_icl1FootF primers.

88 **(viii) pMV306icl1 and pMV306ramB.** pMV306icl1 and pMV306ramB were used for  
89 complementation of the  $\Delta icl1$  and  $\Delta ramB$  mutant strains, respectively. For the construction of  
90 pMV306icl1, a 1,785-bp DNA fragment containing the *icl1* gene of *M. smegmatis* was amplified  
91 by PCR with the F\_icl1com and R\_icl1mut primers using the chromosomal DNA of *M. smegmatis*  
92 as a template. The PCR product was restricted with XbaI and HindIII and cloned into pMV306,  
93 resulting in pMV306icl1.

94 To construct pMV306ramB, a 2,159-bp DNA fragment containing the *ramB* gene of *M. smegmatis*  
95 was amplified by PCR with the F\_ramBcom and R\_ramBmut primers using the chromosomal  
96 DNA of *M. smegmatis* as a template. The PCR product was restricted with XbaI and HindIII and  
97 cloned into pMV306, resulting in pMV306ramB.

98

99 **Construction of mutant strains of *M. smegmatis*.** Deletion mutants of *M. smegmatis* were  
100 constructed by allelic exchange mutagenesis using the corresponding pKOTs-derived suicide  
101 plasmids containing a temperature-sensitive replication origin as described previously (1). In brief,  
102 the temperature-sensitive suicide plasmid was introduced into *M. smegmatis* by electroporation.  
103 Transformants were selected at 30°C (replication-permissive temperature) on 7H9-glucose agar  
104 plates containing hygromycin, and the selected transformants were grown in 7H9-glucose liquid  
105 medium supplemented with hygromycin for 3 days at 30°C. Heterogenotes of *M. smegmatis*,

106 which were generated by a single recombination event, were selected for their hygromycin  
107 resistance on 7H9-glucose agar plates at 42°C (replication-nonpermissive temperature). The  
108 selected heterogenotes were grown on 7H9-glucose medium without antibiotics for 3 days at 37°C.  
109 Isogenic homogenotes were obtained from the heterogenotes after a second recombination by  
110 selecting them for sucrose resistance on 7H9-glucose agar plates containing 10% (w/v) sucrose at  
111 37°C. The allelic exchange was verified by PCR with isolated genomic DNA.

112 **(i)  $\Delta icl1$  and  $\Delta icl2$  mutant.** To construct the  $\Delta icl1$  and  $\Delta icl2$  mutant strains of *M. smegmatis*, the  
113 allelic exchange using pKOTs $\Delta icl1$  and pKOTs $\Delta icl2$  was performed in the WT strain of *M.*  
114 *smegmatis*, respectively.

115 **(ii)  $\Delta icl1\Delta icl2$  mutant.** To construct the  $\Delta icl1\Delta icl2$  mutant of *M. smegmatis*, the allelic exchange  
116 using pKOTs $\Delta icl2$  was performed in the  $\Delta icl1$  strain of *M. smegmatis*.

117 **(iii)  $\Delta ramB$  mutant.** To construct the  $\Delta ramB$  mutant strains of *M. smegmatis*, the allelic exchange  
118 using pKOTs $\Delta ramB$  was performed in the WT strain of *M. smegmatis*.

119 **(iv)  $\Delta prpR$  mutant.** To construct the  $\Delta prpR$  mutant strains of *M. smegmatis*, the allelic exchange  
120 using pKOTs $\Delta prpR$  was performed in the WT strain of *M. smegmatis*.

121 **(v)  $\Delta ramB\Delta prpR$  mutant.** To construct the  $\Delta ramB\Delta prpR$  mutant of *M. smegmatis*, the allelic  
122 exchange using pKOTs $\Delta prpR$  was performed in the  $\Delta ramB$  strain of *M. smegmatis*.

123 **(vi)  $\Delta ramA$  mutant.** To construct the  $\Delta ramA$  mutant strains of *M. smegmatis*, the allelic exchange  
124 using pKOTs $\Delta ramA$  was performed in the WT strain of *M. smegmatis*.

125 SUPPLEMENTAL FIGURES

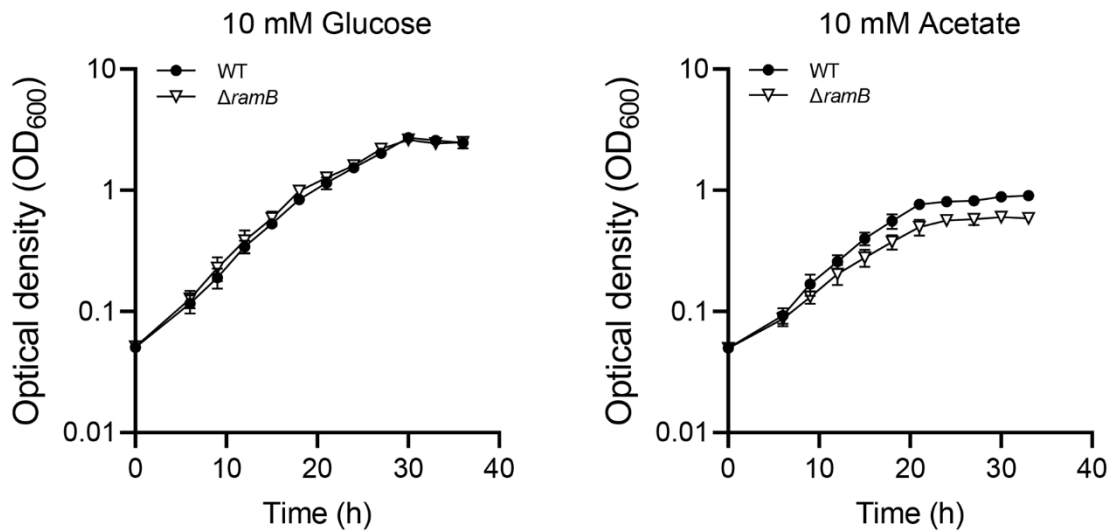

126

127 **FIG S1** Growth of the WT and  $\Delta ramB$  strains of *M. smegmatis* in 7H9 growth medium  
128 supplemented with glucose or acetate as the sole carbon source. The WT and  $\Delta ramB$  mutant strains  
129 were grown aerobically in 7H9 medium supplemented with either 10 mM glucose or 10 mM  
130 acetate at 37°C. Growth of the strains were determined by measuring the OD<sub>600</sub> of the cultures. All  
131 values provided were determined from three biological replicates. The error bars indicate the  
132 standard deviations.

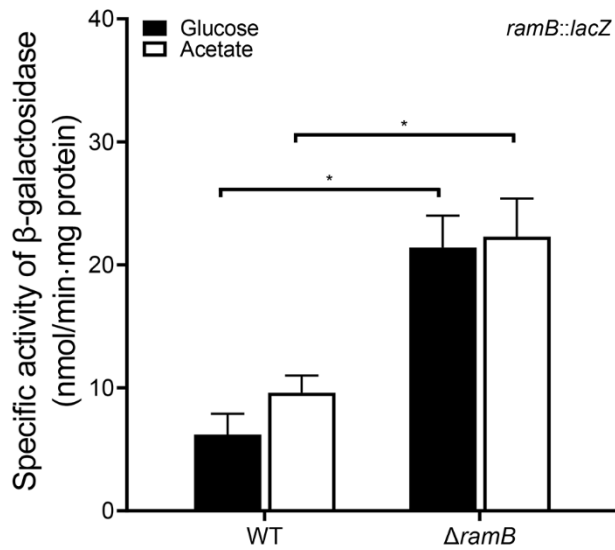

133

134 **FIG S2** Expression levels of the *ramB* gene in the WT and  $\Delta ramB$  mutant strains of *M. smegmatis*.

135 The WT and  $\Delta ramB$  mutant strains containing the *ramB::lacZ* translational fusion plasmid

136 pNCIIramB were grown aerobically to an OD<sub>600</sub> of 0.45 to 0.5 in 7H9 medium supplemented with

137 10 mM glucose or 10 mM acetate as the sole carbon source. Cell-free crude extracts were used to

138 measure  $\beta$ -galactosidase activity. All values provided were determined from three biological

139 replicates. The error bars indicate the standard deviations. \*,  $p < 0.01$ .

140



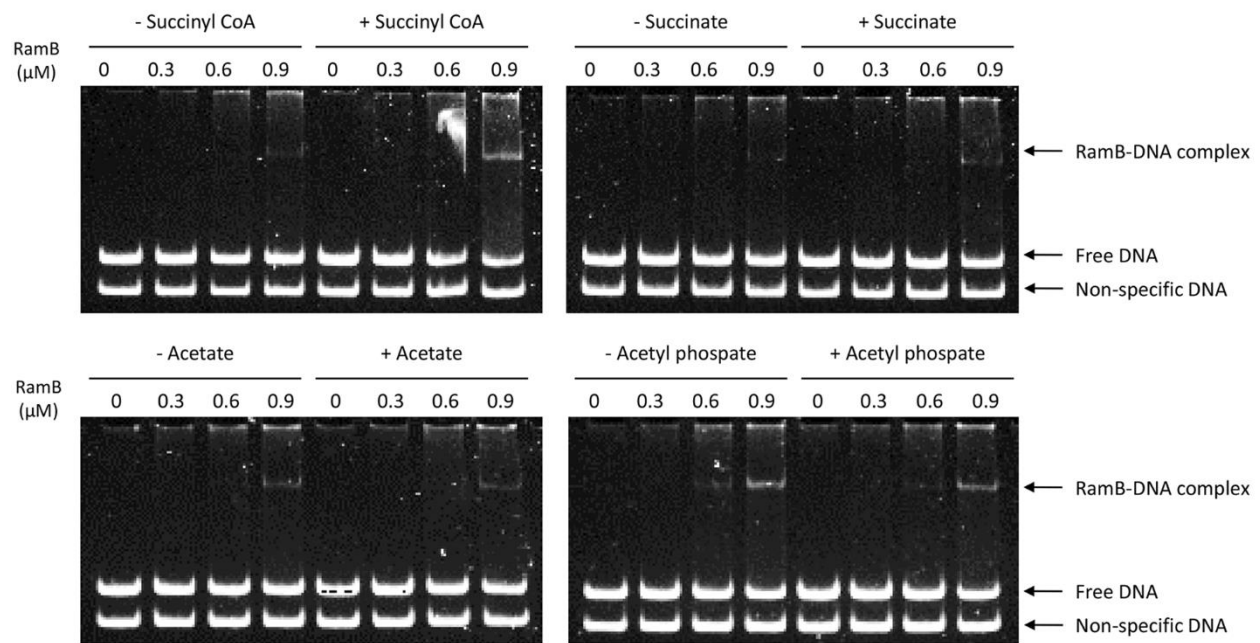

141

142 **FIG S3** EMSA showing the effects of potential effector molecules on binding of RamB to the *icl1*  
 143 upstream region. The mixtures of 184-bp DNA fragments (90 fmol) containing the regulatory  
 144 region of *icl1* and 145-bp DNA fragments (90 fmol) without the RamB-binding site were incubated  
 145 with increasing amounts of purified RamB in the absence and presence of 200 μM each of  
 146 succinyl-CoA, succinate, acetate or acetyl-phosphate. The RamB-DNA reaction mixtures were  
 147 subjected to native PAGE. The concentrations of RamB used in EMSA are given above the lanes.  
 148 The bands corresponding to the RamB-DNA complex, the RamB-unbound 184-bp DNA fragment  
 149 (free DNA), and the 145-bp control DNA (non-specific DNA) are indicated by arrows.

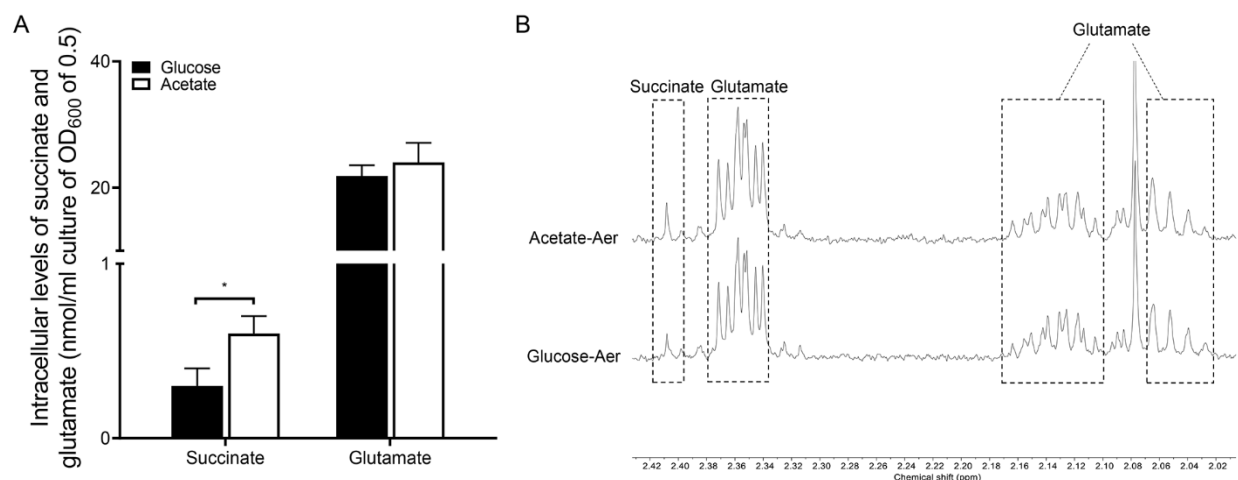

150

151 **FIG S4** Determination of intracellular concentration of succinate and glutamate and 600 MHz  $^1\text{H}$ -  
 152 NMR spectra. (A) The WT strain of *M. smegmatis* was aerobically grown to an  $\text{OD}_{600}$  of 0.5 in  
 153 7H9 medium supplemented with 10 mM glucose or 10 mM acetate as the sole carbon source.  
 154 Extraction of metabolites and  $^1\text{H}$ -NMR were performed as described in Materials and Methods.  
 155 All values provided were determined from three biological replicates. The error bars indicate the  
 156 standard deviations. \*,  $p < 0.05$ . (B) The regions representing the succinate and glutamate peaks  
 157 in NMR spectra ( $\delta$  2-2.44) are magnified. The peaks of the succinate  $\text{CH}_3$  signal at 2.41 ppm and  
 158 the glutamate  $\text{CH}_3$  signals at 2.02-2.07, 2.1-2.17 and 2.33-2.38 ppm are boxed.

```

                                     * * * * *
MSMEG      GTAGCTTCTGAACCGGTACAGCCATCATATTTCTTTCACAA
MTB        GTAGCTTCTGAACCGGTTTCAGTTTTTGGGCGACTTCGCAA

      * * * * * *
MSMEG      TCTTCGCAAGTTAACGCACACGTTTCGCCAAAATTGGCAA
MTB        AATTTGCAAAAAGTCCGCAGGCCGTTGCCGAAATTTCGCAA
           RamBS1                               RamBS2

      * * * *
MSMEG      AGGAAACGGGTGGACCTGCGGTTATGTCATGTGCCATTCGT
MTB        GTGAAATGGGTGGACCAAGCGTTGACACGCTGTGCCATGGT
           -35                               -10

      * * * * * * * * * * * * * * * * * * * * * * * * * * * *
MSMEG      CGGGTTAGCACACCAGGTGAAGCTGCTGCGGT - N41 - ATG
MTB        CGAGTTAGCACACCAGGTGAAGCTGCGCCGTT - N66 - ATG
           ↳ +1 RamBS3                               icl1 start

```

159

160 **FIG S5** Nucleotide sequences of the *icl1* upstream regions of *M. smegmatis* mc<sup>2</sup>155 and *M.*  
 161 *tuberculosis* H37Rv. The TSPs for *icl1* of *M. smegmatis* and *M. tuberculosis* were previously  
 162 reported (2, 3). The TSPs are indicated by +1. The -10 and -35 regions of the putative *icl1*  
 163 promoters deduced from the TSPs are enclosed in boxes. The RamB-binding sites (RamBS1,  
 164 RamBS2, and RamBS3) are marked by green font and underlines below their sequences. The  
 165 conserved nucleotides in the RamB-binding sites of *M. smegmatis* and *M. tuberculosis* are denoted  
 166 by asterisks. The start codons of *icl1* are marked by red font, and the arrow below the start codons  
 167 indicates the transcriptional direction. Abbreviations. MTB, *icl1* upstream region of *M.*  
 168 *tuberculosis*; MSMEG, *icl1* upstream region of *M. smegmatis*.

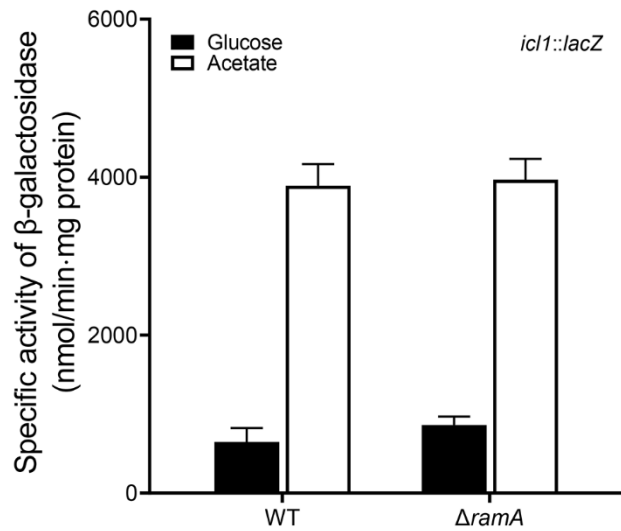

169

170 **FIG S6** Expression levels of the *icl1* gene in the WT and  $\Delta ramA$  mutant strains of *M. smegmatis*.

171 The WT and  $\Delta ramA$  mutant strains containing the *icl1::lacZ* translational fusion plasmid pNCII*icl1*

172 were grown aerobically to an OD<sub>600</sub> of 0.45 to 0.5 in 7H9 medium supplemented with 10 mM

173 glucose or 10 mM acetate as the sole carbon source. Cell-free crude extracts were used to measure

174  $\beta$ -galactosidase activity. All values provided were determined from three biological replicates. The

175 error bars indicate the standard deviations.

176

-223 GCGAGGAGACGAAAGCCGTCGCCTGTCTCTTCTCGCTCTGAATCAATCACGTTTAACAGT  
 -163 ACGGGCGTACTGACCTGCGAAAAGTGGCTACTCGCCGGTAGCTTCTGAACCGGTACAGCC  
 -103 ATCATATTCTTCACAATCTTCGCAAGTTAACGCACACGGTTTCGCCAAAATTGGCAAAGG  
 -43 AACCGGGTGGACCTGCGGTTATGTTCATGTGCCATCGTTCGGTTAGCACACCAGTGAAGCT  
 +18 GCTGCGGTGTTAACAACCGCAGTGAAGTAAACAACCGAAGGAGCCGTCCAATGTCGACCGT

RamBS1  
 GlnR  
 RegX3  
 -35  
 -10  
 +1  
 RamBS2  
 RamBS3  
*icl1* start

177

178 **FIG S7** The upstream sequence of the *icl1* gene including its putative promoter region and *cis*-

179 acting elements involved in the regulation of the *icl1* gene. The RamB-binding sites (RamBS1,

180 RamBS2, and RamBS3) are indicated in green font. The suggested RegX3 and GlnR binding sites

181 are boxed in blue. The TSP of the *icl1* gene is marked by +1 (3). The putative promoter region (-

182 35 and -10) of the *icl1* gene is boxed. The start codons of *icl1* is denoted both in red font and by

183 the arrow indicating the transcriptional direction. The numbers on the left side of the sequences

184 show the positions of the leftmost nucleotides relative to the TPS of the *icl1* gene.

185

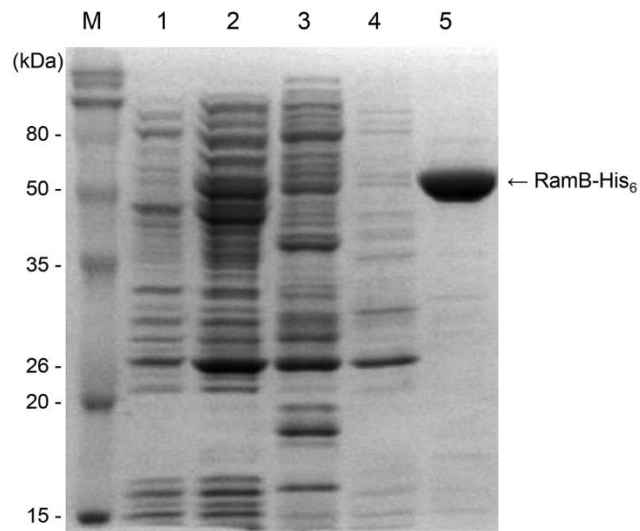

186

187 **FIG S8** SDS-PAGE analysis of purified RamB. C-terminally His<sub>6</sub>-tagged RamB was  
 188 overexpressed in the *E. coli* BL21 CodonPlus (DE3)-RP strain with pET29bramB. C-terminally  
 189 His<sub>6</sub>-tagged RamB was purified by affinity chromatography using Ni-Sepharose high-performance  
 190 resin (GE Healthcare, Piscataway, NJ). Lane M, molecular weight marker. Lane 1, lysates of *E.*  
 191 *coli* BL21 CodonPlus (DE3)-RP harboring the empty vector pET29b. Lane 2, lysates of *E. coli*  
 192 BL21 CodonPlus (DE3)-RP harboring pET29bramB. Lane 3, eluents during the washing step with  
 193 buffer A [20 mM Tris-HCl (pH 8.0), 200 mM NaCl and 1 mM DTT] containing 5 mM imidazole.  
 194 Lane 4, eluents during the washing step with buffer A containing 75 mM imidazole. Lane 5,  
 195 purified C-terminally His<sub>6</sub>-tagged RamB.

196

197 **TABLE S1** Strains and plasmids used in this study

| Strain/plasmid                                  | Relevant phenotype/genotype                                                                                                                                        | Reference  |
|-------------------------------------------------|--------------------------------------------------------------------------------------------------------------------------------------------------------------------|------------|
| <u>Strains</u>                                  |                                                                                                                                                                    |            |
| <i>E. coli</i> DH5 $\alpha$                     | $\Phi$ 80dlacZ $\Delta$ M15 $\Delta$ lacU169 <i>recA1 endA1 hsdR17 supE44 thi1 gyrA96 relA1</i>                                                                    | 4          |
| <i>E. coli</i> BL21 CodonPlus (DE3)-RP          | F <sup>-</sup> <i>ompT hsd S<sub>B</sub> (r<sub>B</sub><sup>-</sup>, m<sub>B</sub><sup>-</sup>) dcm gal Tet<sup>r</sup> endA</i> The [argU proL Cam <sup>r</sup> ] | Stratagene |
| <i>M. smegmatis</i> mc <sup>2</sup> 155         | High-transformation-efficiency mutant of <i>M. smegmatis</i> ATCC 607                                                                                              | 5          |
| <i>M. smegmatis</i> $\Delta$ icl1               | MSMEG_0911 ( <i>icl1</i> ) deletion mutant derived from <i>M. smegmatis</i> mc <sup>2</sup> 155                                                                    | This study |
| <i>M. smegmatis</i> $\Delta$ icl2               | MSMEG_3706 ( <i>icl2</i> ) deletion mutant derived from <i>M. smegmatis</i> mc <sup>2</sup> 155                                                                    | This study |
| <i>M. smegmatis</i> $\Delta$ icl1 $\Delta$ icl2 | MSMEG_0911 ( <i>icl1</i> ) and MSMEG_3706 ( <i>icl2</i> ) double-deletion mutant derived from <i>M. smegmatis</i> mc <sup>2</sup> 155                              | This study |
| <i>M. smegmatis</i> $\Delta$ ramB               | MSMEG_0906 ( <i>ramB</i> ) deletion mutant derived from <i>M. smegmatis</i> mc <sup>2</sup> 155                                                                    | This study |
| <i>M. smegmatis</i> $\Delta$ prpR               | MSMEG_6643 ( <i>prpR</i> ) deletion mutant derived from <i>M. smegmatis</i> mc <sup>2</sup> 155                                                                    | This study |
| <i>M. smegmatis</i> $\Delta$ ramB $\Delta$ prpR | MSMEG_0906 ( <i>ramB</i> ) and MSMEG_6643 ( <i>prpR</i> ) double-deletion mutant derived from <i>M. smegmatis</i> mc <sup>2</sup> 155                              | This study |
| <i>M. smegmatis</i> $\Delta$ ramA               | MSMEG_5651 ( <i>ramA</i> ) deletion mutant derived from <i>M. smegmatis</i> mc <sup>2</sup> 155                                                                    | This study |
| <i>M. smegmatis</i> $\Delta$ crp1               | MSMEG_6189 ( <i>crp1</i> ) insertion mutant derived from <i>M. smegmatis</i> mc <sup>2</sup> 155; Hyg <sup>r</sup>                                                 | 6          |
| <u>plasmids</u>                                 |                                                                                                                                                                    |            |
| pKOTs                                           | Hyg <sup>r</sup> ; pKO-based vector constructed by inserting the HindIII-KpnI fragment containing pAL500Ts and pUC ori derived from pDE                            | 1          |
| pBluescript II KS+                              | Amp <sup>r</sup> ; <i>lacPOZ'</i>                                                                                                                                  | Stratagene |
| pNCII                                           | Hyg <sup>r</sup> ; promoterless <i>lacZ</i>                                                                                                                        | 7          |
| pEMII                                           | Km <sup>r</sup> ; promoterless <i>lacZ</i>                                                                                                                         | This study |

|                |                                                                                                                                                           |            |
|----------------|-----------------------------------------------------------------------------------------------------------------------------------------------------------|------------|
| pET29b         | Km <sup>r</sup> ; T7 promoter, ribosome binding site, and translation start codon overlapping with NdeI site                                              | Novagen    |
| pUC19          | Amp <sup>r</sup> ; <i>lacPOZ'</i>                                                                                                                         | 8          |
| pMV306         | Km <sup>r</sup> ; integration vector containing <i>int</i> and the <i>attP</i> site of mycobacteriophage L5 for integration into the mycobacterial genome | 9          |
| pKOTsΔicl1     | pKOTs with 0.913-kb DNA fragment containing 1.012 kb-deleted <i>icl1</i>                                                                                  | This study |
| pKOTsΔicl2     | pKOTs with 0.904-kb DNA fragment containing 2.062 kb-deleted <i>icl2</i>                                                                                  | This study |
| pKOTsΔramB     | pKOTs with 0.942-kb DNA fragment containing 1.203 kb-deleted <i>ramB</i>                                                                                  | This study |
| pKOTsΔprpR     | pKOTs with 0.989-kb DNA fragment containing 1.102 kb-deleted <i>prpR</i>                                                                                  | This study |
| pKOTsΔramA     | pKOTs with 0.881-kb DNA fragment containing 0.384 kb-deleted <i>ramA</i>                                                                                  | This study |
| pBSIIicl1 full | pBluescript II KS+::1.935-kb HindIII-NotI fragment containing the <i>icl1</i>                                                                             | This study |
| pBSIIΔicl1     | pBluescript II KS+ with 0.913-kb DNA fragment containing 1.012 kb-deleted <i>icl1</i>                                                                     | This study |
| pBSIIicl1      | pBluescript II KS+::0.542-kb ClaI-XbaI fragment containing the <i>icl1</i> promoter region                                                                | This study |
| pBSIIicl1BM1   | pBSIIicl1 with three point mutations (TTC→GAG) in RamBS1                                                                                                  | This study |
| pBSIIicl1BM2   | pBSIIicl1 with two point mutations (TT→GA) in RamBS2                                                                                                      | This study |
| pNCIIicl1      | pNCII:: 0.542-kb ClaI-XbaI fragment containing the <i>icl1</i> promoter region                                                                            | This study |
| pNCIIicl2      | pNCII:: 0.473-kb ClaI-XbaI fragment containing the <i>icl2</i> promoter region                                                                            | This study |
| pNCIIramB      | pNCII:: 0.443-kb ClaI-XbaI fragment containing the <i>ramB</i> promoter region                                                                            | This study |
| pNCIIicl1BM1   | pNCII::0.542-kb ClaI-XbaI fragment from pBSIIicl1BM1                                                                                                      | This study |



|                         |                                                                                                             |            |
|-------------------------|-------------------------------------------------------------------------------------------------------------|------------|
| pNCII <i>icl1</i> BM2   | pNCII::0.542-kb ClaI-XbaI fragment from<br>pBSII <i>icl1</i> BM2                                            | This study |
| pEMII <i>icl1</i>       | pEMII:: 0.542-kb ClaI-XbaI fragment containing<br>the <i>icl1</i> promoter region                           | This study |
| pET29b <i>ramB</i>      | pET29b::1.472-kb NdeI-HindIII fragment<br>containing <i>ramB</i> with 6 His codons before its stop<br>codon | This study |
| pUC19 <i>icl1</i> FootF | pUC19::0.353-kb EcoRI-HindIII fragment<br>containing the <i>icl1</i> promoter region                        | This study |
| pUC19 <i>icl1</i> FootR | pUC19::0.353-kb EcoRI-HindIII fragment<br>containing the <i>icl1</i> promoter region                        | This study |
| pMV306 <i>icl1</i>      | pMV306::1.765-kb XbaI-HindIII fragment<br>containing <i>icl1</i>                                            | This study |
| pMV306 <i>ramB</i>      | pMV306::2.139-kb XbaI-HindIII fragment<br>containing <i>ramB</i>                                            | This study |

198 \*Abbreviations: Amp<sup>r</sup>, ampicillin resistance; Cam<sup>r</sup>, chloramphenicol resistance; Hyg<sup>r</sup>, hygromycin  
199 resistance; Km<sup>r</sup>, kanamycin resistance.

200

201 TABLE S2 Oligonucleotides used in this study

| Oligonucleotide | Nucleotide sequence (5'→3')             | Purpose                               |
|-----------------|-----------------------------------------|---------------------------------------|
| F_icl1mut       | ATATGCGGCCGCTCATCTCCCACACCCACCC         | <i>Δicl1</i> construction             |
| R_icl1mut       | ATATAAGCTTGAAGGCGTCAGTGGTGTCTG          | <i>Δicl1</i> construction             |
| F_icl2mut       | ATATGCGGCCGCGCTGACCGACGACCTGGG          | <i>Δicl2</i> construction             |
| R_icl2rec       | GCTGAAGATGCCGTGCGCGTGATGCCCTCGAACCGTGG  | <i>Δicl2</i> construction             |
| F_icl2rec       | CCACGGTTTCGAGGGCATCACGCGCACGGCATCTTCAGC | <i>Δicl2</i> construction             |
| R_icl2mut       | ATATAAGCTTTCGGGGCTCTGTGCACTG            | <i>Δicl2</i> construction             |
| F_ramBmut       | ATATGCGGCCGCGTCGTGGACACGCTGGG           | <i>ΔramB</i> construction             |
| R_ramBrec       | GGGCAGTTGTGCGGTTTCGTGGTTGAGGTAGCTCGGCG  | <i>ΔramB</i> construction             |
| F_ramBrec       | CGCCGAGCTACCTCAACCACGAACGCGACAACCTGCC   | <i>ΔramB</i> construction             |
| R_ramBmut       | ATATAAGCTTGGCCGTGTGTTTCGGTGTCTG         | <i>ΔramB</i> construction             |
| F_prpRmut       | ATATGCGGCCGCACTCCGGGGAGTATCCACCG        | <i>ΔprpR</i> construction             |
| R_prpRrec       | GACTTTGCATCCGGCGCCTGGGTCGGCAGGTCTGAAG   | <i>ΔprpR</i> construction             |
| F_prpRrec       | CTTCGACCTGCCGACCCAGGCGCCGGATGCAAAGTC    | <i>ΔprpR</i> construction             |
| R_prpRmut       | ATATAAGCTTCTGGAGGGATACGAGCGGG           | <i>ΔprpR</i> construction             |
| F_ramAmut       | ATATGCGGCCGCCCTCCTCCACGATCCACAGC        | <i>ΔramA</i> construction             |
| R_ramArec       | CGTGCACCTCGCGGATCTCGAAGAACTCCGTGAGCAGC  | <i>ΔramA</i> construction             |
| F_ramArec       | GCTGCTCACGGAGTTCTTCGAGATCCGCGAGGTGCACG  | <i>ΔramA</i> construction             |
| R_ramAmut       | ATATAAGCTTCCGCGACCAGTTCCTCG             | <i>ΔramA</i> construction             |
| F_icl1lacZ      | ATATTCTAGATTGCGCGTGACCATCGAG            | <i>icl1::lacZ</i> fusion              |
| R_icl1lacZ      | ATATATCGATCTCGGGGGTGTAGTCGCG            | <i>icl1::lacZ</i> fusion              |
| F_icl2lacZ      | ATATTCTAGAGCGGTGTTCGGATCGGTC            | <i>icl2::lacZ</i> fusion              |
| R_icl2lacZ      | ATATATCGATGATGCCCTCGAACCGTGG            | <i>icl2::lacZ</i> fusion              |
| F_ramBlacZ      | ATATTCTAGAGCAGCGGTTCCAGCAG              | <i>ramB::lacZ</i> fusion              |
| R_ramBlacZ      | ATATATCGATGCGCACGTCGTGCTCGATC           | <i>ramB::lacZ</i> fusion              |
| F_icl1BM1       | CATATTTCTTCAACAATCGAGGCAAGTTAACGCACAC   | Site-directed mutagenesis<br>(RamBS1) |
| R_icl1BM1       | GTGTGCGTTAACTTGCCTCGATTGTGAAGAAATATG    | Site-directed mutagenesis<br>(RamBS1) |
| F_icl1BM2       | CACGTTTCGCCAAAAGAGGCAAAGGAAACGGGTG      | Site-directed mutagenesis<br>(RamBS2) |
| R_icl1BM2       | CACCCGTTTCCTTTGCCTCTTTTGCGGAAACGTG      | Site-directed mutagenesis<br>(RamBS2) |
| F_km            | ATATCCGCGGGGACACTGAGTCCTAAAGAGGGGG      | pEMII construction                    |
| R_km            | ATATCCGCGGGGCTCAGTGGAACTAGTGAGGTCTGC    | pEMII construction                    |
| F_ramBhis6      | ATATCATATGCCGAAGACGTTTCGTCTG            | <i>ramB</i> overexpression            |

|                      |                                                       |                                      |
|----------------------|-------------------------------------------------------|--------------------------------------|
| <b>R_ramBhis6</b>    | ATATAAGCTTTCAGTGATGGTGATGGTGATGACCGAGCGGT<br>TTCACCTC | <i>ramB</i> overexpression           |
| <b>F_icl1FootF</b>   | ATATGAATTCTTCGGTCCGGAACCTCACC                         | DNase I footprinting                 |
| <b>R_icl1FootF</b>   | ATATAAGCTTATTGGACGGCTCCTTCGG                          | DNase I footprinting                 |
| <b>F_icl1FootR</b>   | ATATAAGCTTTTCGGTCCGGAACCTCACC                         | DNase I footprinting                 |
| <b>R_icl1FootR</b>   | ATATGAATTCATTGGACGGCTCCTTCGG                          | DNase I footprinting                 |
| <b>F_TAMRA_pUC19</b> | GTTTTCCCAGTCACGACGTTGTA                               | DNase I footprinting                 |
| <b>F_icl1com</b>     | ATATTCTAGACGGGCGTACTGACCTGC                           | $\Delta$ <i>icl1</i> complementation |
| <b>F_ramBcom</b>     | ATATTCTAGAGGTGCTGACGCTCCACG                           | $\Delta$ <i>ramB</i> complementation |
| <b>F_icl1EMSA</b>    | CGGTACAGCCATCATATTCTTTC                               | EMSA (specific DNA)                  |
| <b>R_icl1EMSA</b>    | GACATTGGACGGCTCCTTC                                   | EMSA (specific DNA)                  |
| <b>F_EMSSans</b>     | TGTAAAGCCTGGGGTGCC                                    | EMSA (control DNA)                   |
| <b>R_EMSSans</b>     | GCCCAATACGCAAACCGC                                    | EMSA (control DNA)                   |

202

203   **REFERENCES**

- 204   1.     Jeong JA, Lee HN, Ko IJ, Oh JI. 2013. Development of new vector systems as genetic  
205     tools applicable to mycobacteria. *J Life Science* 23:290-298.
- 206   2.     Cortes T, Schubert OT, Rose G, Arnvig KB, Comas I, Aebersold R, Young DB. 2013.  
207     Genome-wide mapping of transcriptional start sites defines an extensive leaderless  
208     transcriptome in *Mycobacterium tuberculosis*. *Cell Rep* 5:1121-1131.
- 209   3.     Martini MC, Zhou Y, Sun H, Shell SS. 2019. Defining the Transcriptional and Post-  
210     transcriptional Landscapes of *Mycobacterium smegmatis* in Aerobic Growth and  
211     Hypoxia. *Front Microbiol* 10:591.
- 212   4.     Jessee J. 1986. New subcloning efficiency competent cells:  $>1 \times 10^6$  transformants/ $\mu\text{g}$ .  
213     *Focus* 8:9-10.
- 214   5.     Snapper SB, Melton RE, Mustafa S, Kieser T, Jacobs WR, Jr. 1990. Isolation and  
215     characterization of efficient plasmid transformation mutants of *Mycobacterium*  
216     *smegmatis*. *Mol Microbiol* 4:1911-1919.
- 217   6.     Lee HN, Lee NO, Han SJ, Ko IJ, Oh JI. 2014. Regulation of the *ahpC* gene encoding  
218     alkyl hydroperoxide reductase in *Mycobacterium smegmatis*. *PLoS One* 9:e111680.
- 219   7.     Oh Y, Song SY, Kim HJ, Han G, Hwang J, Kang HY, Oh JI. 2020. The Partner Switching  
220     System of the SigF Sigma Factor in *Mycobacterium smegmatis* and Induction of the SigF  
221     Regulon Under Respiration-Inhibitory Conditions. *Front Microbiol* 11:588487.
- 222   8.     Yanisch-Perron C, Vieira J, Messing J. 1985. Improved M13 phage cloning vectors and  
223     host strains: nucleotide sequences of the M13mp18 and pUC19 vectors. *Gene* 33:103-  
224     119.

225 9. Stover CK, de la Cruz VF, Fuerst TR, Burlein JE, Benson LA, Bennett LT, Bansal GP,  
226 Young JF, Lee MH, Hatfull GF, et al. 1991. New use of BCG for recombinant vaccines.  
227 Nature 351:456-460.

228
